# Supplementary material for: Characterization of the Caudal Ventral Tubercle in the Sixth Cervical Vertebra in Modern Equus ferus caballus
Source: MDPI journal article supplement (doi:10.3390/ani13142384), 2023-07-22
Supplement: s1 [file s1]

**Supplementary Table S1.** Details of the 76 osseous specimens that displayed an absent caudal ventral tubercle of the sixth cervical vertebra (only the osseous specimen was observed).

| ID   | Country | Age    | Sex |  | ID   | Country     | Age | Sex |
|------|---------|--------|-----|--|------|-------------|-----|-----|
| Tb1  | AUS     | 5      | M   |  | Wb1  | AUS         | 9   | F   |
| Tb2  | AUS     | 6      | M   |  | Wb2  | AUS         | 23  | M   |
| Tb3  | AUS     | 16     | F   |  | Wb3  | AUS         | 14  | M   |
| Tb4  | AUS     | 18     | M   |  | Wb4  | AUS         | 6   | M   |
| Tb5  | AUS     | 5      | F   |  | Wb5  | AUS         | 15  | F   |
| Tb6  | AUS     | 12     | M   |  | Wb6  | AUS         | 6   | F   |
| Tb7  | AUS     | 12     | F   |  | Wb7  | US          | 8   | M   |
| Tb8  | AUS     | 10     | M   |  | Wb8  | US          | 17  | M   |
| Tb9  | AUS     | 4      | M   |  | Wb9  | US          | 6   | M   |
| Tb10 | AUS     | 12     | F   |  | Wb10 | Netherlands | 18  | F   |
| Tb11 | AUS     | 7      | F   |  | Wb11 | Netherlands | 13  | F   |
| Tb12 | AUS     | 22     | F   |  | Wb12 | Netherlands | 2   | F   |
| Tb13 | AUS     | 10mths | M   |  | Wb13 | Belgium     | SB  | M   |
| Tb14 | AUS     | 12     | M   |  |      |             |     |     |
| Tb15 | AUS     | 8      | F   |  | ASH1 | AUS         | SB  | F   |
| Tb16 | AUS     | 18     | M   |  | ASH2 | AUS         | 3   | M   |
| Tb17 | AUS     | 3      | M   |  | ASH3 | AUS         | 5   | M   |
| Tb18 | AUS     | 8      | F   |  | ASH4 | AUS         | 22  | F   |
| Tb19 | AUS     | 9      | M   |  | ASH5 | AUS         | 10  | M   |
| Tb20 | AUS     | 6      | M   |  | ASH6 | AUS         | 8   | F   |
| Tb21 | AUS     | 6      | M   |  |      |             |     |     |
| Tb22 | AUS     | 8      | F   |  | XB1  | AUS         | 30  | M   |
| Tb23 | AUS     | 9      | M   |  | XB2  | AUS         | 12  | F   |
| Tb24 | AUS     | 6      | M   |  | XB3  | AUS         | SB  | M   |
| Tb25 | AUS     | 6      | M   |  | XB4  | AUS         | 8   | M   |
| Tb26 | US      | 9      | F   |  | XB5  | NZ          | 15  | M   |
| Tb27 | US      | 9      | M   |  |      |             |     |     |
| Tb28 | US      | 16     | M   |  | St1  | AUS         | 13  | M   |
| Tb29 | US      | 12     | M   |  | St2  | AUS         | 12  | M   |
| Tb30 | US      | 24     | F   |  | St3  | NZ          | 22  | M   |
| Tb31 | US      | 5      | M   |  | St4  | Sweden      | 7   | M   |
| Tb32 | US      | 20+    | F   |  |      |             |     |     |
| Tb33 | US      | 22     | F   |  | Ap1  | US          | 23  | F   |
| Tb34 | Japan   | 17     | F   |  | Ap2  | US          | 22  | F   |
| Tb35 | Japan   | 22     | M   |  | Ap3  | US          | 35  | M   |
| Tb36 | Japan   | 23     | M   |  |      |             |     |     |
| Tb37 | Japan   | 7      | F   |  | QH1  | US          | 28  | M   |
| Tb38 | UK      | 12     | M   |  | QH2  | US          | 12  | F   |
| Tb39 | Ireland | 13     | M   |  |      |             |     |     |
| Tb40 | NZ      | 8      | F   |  | ISH1 | UK          | 5   | M   |
|      |         |        |     |  |      |             |     |     |
| Fr1  | US      | 10     | M   |  | RP1  | AUS         | 8   | M   |

**Key:** COUNTRIES: AUS – Australia; NZ – New Zealand; UK – United Kingdom; US – United States of America. BREEDS: Ap – Appaloosa; ASH – Australian Stock Horse; ISH – Irish Sport Horse; QH – Quarter Horse; RP – Riding Pony; St – Standardbred; Tb – Thoroughbred; Wb – Warmblood; XB – Cross Bred. AGE: SB – Still Born.

**Supplementary Table 2.** Individual grades of the 76 sixth cervical vertebrae selected for anomalous variations of the ventral process.

| ID   | Laterality | Unilateral<br>L or R | aCVT<br>Left | aCVT<br>right | aCrVT<br>left | aCrVT<br>Right |  | ID   | Laterality | Unilateral<br>L or R | aCVT<br>Left | aCVT<br>right | aCrVT<br>left | aCrVT<br>Right |
|------|------------|----------------------|--------------|---------------|---------------|----------------|--|------|------------|----------------------|--------------|---------------|---------------|----------------|
| Tb1  | Unilateral | L                    | 4            | 0             | 2             | 0              |  | Wb1  | Unilateral | R                    | 0            | 3             | 0             | 0              |
| Tb2  | Unilateral | L                    | 4            | 0             | 2             | 0              |  | Wb2  | Bilateral  |                      | 4            | 4             | 3             | 2              |
| Tb3  | Bilateral  |                      | 4            | 4             | 3             | 3              |  | Wb3  | Unilateral | L                    | 3            | 0             | 0             | 0              |
| Tb4  | Unilateral | L                    | 2            | 0             | 0             | 0              |  | Wb4  | Bilateral  |                      | 4            | 4             | 1             | 0              |
| Tb5  | Unilateral | L                    | 4            | 0             | 2             | 0              |  | Wb5  | Unilateral | L                    | 4            | 0             | 0             | 0              |
| Tb6  | Unilateral | R                    | 0            | 1             | 0             | 0              |  | Wb6  | Unilateral | L                    | 1            | 0             | 0             | 0              |
| Tb7  | Unilateral | R                    | 0            | 4             | 0             | 0              |  | Wb7  | Unilateral | L                    | 4            | 0             | 1             | 0              |
| Tb8  | Bilateral  |                      | 4            | 4             | 1             | 1              |  | Wb8  | Bilateral  |                      | 4            | 4             | 0             | 1              |
| Tb9  | Unilateral | L                    | 4            | 0             | 3             | 0              |  | Wb9  | Bilateral  |                      | 4            | 4             | 0             | 1              |
| Tb10 | Bilateral  |                      | 3            | 4             | 0             | 0              |  | Wb10 | Unilateral | R                    | 0            | 2             | 0             | 0              |
| Tb11 | Unilateral | L                    | 4            | 0             | 2             | 0              |  | Wb11 | Unilateral | L                    | 2            | 0             | 0             | 0              |
| Tb12 | Bilateral  |                      | 4            | 4             | 0             | 0              |  | Wb12 | Unilateral | L                    | 4            | 0             | 2             | 0              |
| Tb13 | Unilateral | R                    | 0            | 4             | 0             | 2              |  | Wb13 | Bilateral  |                      | 4            | 4             | 2             | 2              |
| Tb14 | Unilateral | L                    | 2            | 0             | 0             | 0              |  |      |            |                      |              |               |               |                |
| Tb15 | Bilateral  |                      | 4            | 4             | 2             | 1              |  | ASH1 | Bilateral  |                      | 2            | 4             | 0             | 0              |
| Tb16 | Bilateral  |                      | 4            | 4             | 0             | 0              |  | ASH2 | Bilateral  |                      | 4            | 4             | 3             | 3              |
| Tb17 | Bilateral  |                      | 4            | 4             | 0             | 0              |  | ASH3 | Unilateral | R                    | 0            | 4             | 0             | 0              |
| Tb18 | Bilateral  |                      | 4            | 4             | 0             | 0              |  | ASH4 | Unilateral | L                    | 4            | 0             | 2             | 0              |
| Tb19 | Unilateral | L                    | 4            | 0             | 2             | 0              |  | ASH5 | Unilateral | L                    | 4            | 0             | 2             | 0              |
| Tb20 | Unilateral | L                    | 4            | 0             | 2             | 0              |  | ASH6 | Unilateral | L                    | 4            | 0             | 2             | 0              |
| Tb21 | Bilateral  |                      | 4            | 4             | 2             | 2              |  |      |            |                      |              |               |               |                |
| Tb22 | Bilateral  |                      | 4            | 4             | 0             | 0              |  | XB1  | Unilateral | L                    | 4            | 0             | 2             | 0              |
| Tb23 | Unilateral | L                    | 4            | 0             | 2             | 0              |  | XB2  | Bilateral  |                      | 4            | 1             | 2             | 0              |
| Tb24 | Unilateral | L                    | 4            | 0             | 2             | 0              |  | XB3  | Bilateral  |                      | 4            | 4             | 0             | 0              |
| Tb25 | Bilateral  |                      | 4            | 4             | 2             | 2              |  | XB4  | Unilateral | L                    | 4            | 0             | 3             | 0              |
| Tb26 | Unilateral | L                    | 4            | 0             | 2             | 0              |  | XB5  | Unilateral | R                    | 0            | 3             | 0             | 0              |
| Tb27 | Unilateral | L                    | 4            | 0             | 1             | 0              |  |      |            |                      |              |               |               |                |
| Tb28 | Bilateral  |                      | 4            | 4             | 1             | 1              |  | St1  | Unilateral | L                    | 1            | 0             | 0             | 0              |
| Tb29 | Unilateral | L                    | 1            | 0             | 0             | 0              |  | St2  | Unilateral | L                    | 2            | 0             | 0             | 0              |
| Tb30 | Unilateral | L                    | 4            | 0             | 0             | 0              |  | St3  | Unilateral | L                    | 2            | 0             | 0             | 0              |
| Tb31 | Bilateral  |                      | 4            | 4             | 2             | 2              |  | St4  | Unilateral | R                    | 0            | 2             | 0             | 0              |
| Tb32 | Unilateral | R                    | 0            | 4             | 0             | 0              |  |      |            |                      |              |               |               |                |
| Tb33 | Unilateral | L                    | 3            | 0             | 0             | 0              |  | Ap1  | Bilateral  |                      | 4            | 4             | 2             | 1              |
| Tb34 | Unilateral | R                    | 0            | 4             | 0             | 2              |  | Ap2  | Bilateral  |                      | 4            | 4             | 1             | 0              |
| Tb35 | Unilateral | L                    | 4            | 0             | 1             | 0              |  | Ap3  | Bilateral  |                      | 4            | 4             | 0             | 0              |
| Tb36 | Unilateral | L                    | 3            | 0             | 0             | 0              |  |      |            |                      |              |               |               |                |
| Tb37 | Unilateral | L                    | 3            | 0             | 0             | 0              |  | QH1  | Unilateral | L                    | 4            | 0             | 2             | 0              |

|      |            |   |   |   |   |   |  |      |            |   |   |   |   |   |
|------|------------|---|---|---|---|---|--|------|------------|---|---|---|---|---|
| Tb38 | Unilateral | R | 0 | 2 | 0 | 0 |  | QH2  | Bilateral  |   | 4 | 4 | 1 | 2 |
| Tb39 | Bilateral  |   | 4 | 3 | 0 | 0 |  |      |            |   |   |   |   |   |
| Tb40 | Unilateral | L | 3 | 0 | 0 | 0 |  | ISH1 | Unilateral | R | 0 | 2 | 0 | 0 |
| Fr 1 | Bilateral  |   | 4 | 4 | 2 | 3 |  | RP1  | Bilateral  |   | 4 | 3 | 1 | 0 |

**Key:** a – absent; ID – identification; L – left; R – right.
